# Supplementary material for: Artificial intelligence reinforced upconversion nanoparticle-based lateral flow assay via transfer learning
Source: PubMed Central journal article supplement — Fundam Res. 2022 May 2;3(4):544–56. doi: 10.1016/j.fmre.2022.03.025 (PMC11197505; doi:10.1016/j.fmre.2022.03.025), 2022-05-02

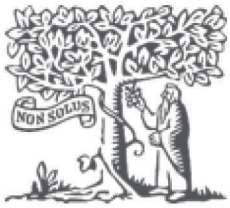

ELSEVIER

# Certificate of Elsevier Language Editing Services

The following article was edited by Elsevier Language Editing Services:  
"Artificial Intelligence Reinforced Upconversion Nanoparticle-  
based Lateral Flow Assay via Transfer Learning"

Authored by:

Wei Wang, Kuo Chen, Xing Ma, Jinhong Guo

Date: 01-Mar-2022

Serial number: LE-233675-10777BD49D27

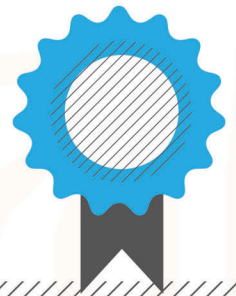

Supplement: mmc1.pdf [file mmc1.pdf]
